# Supplementary material for: Maternal body mass index, gestational weight gain, and the risk of overweight and obesity across childhood: An individual participant data meta-analysis
Source: PLOS journal article supplement (doi:10.1371/journal.pmed.1002744), 2019-02-11
Supplement: S2 (10.1371/journal.pmed.1002744.s002) [file journal.pmed.1002744.s002]

**S2 Fig. Overall and country-specific population attributable risk fractions of maternal overweight, obesity and excessive gestational weight gain for mid childhood overweight/obesity**

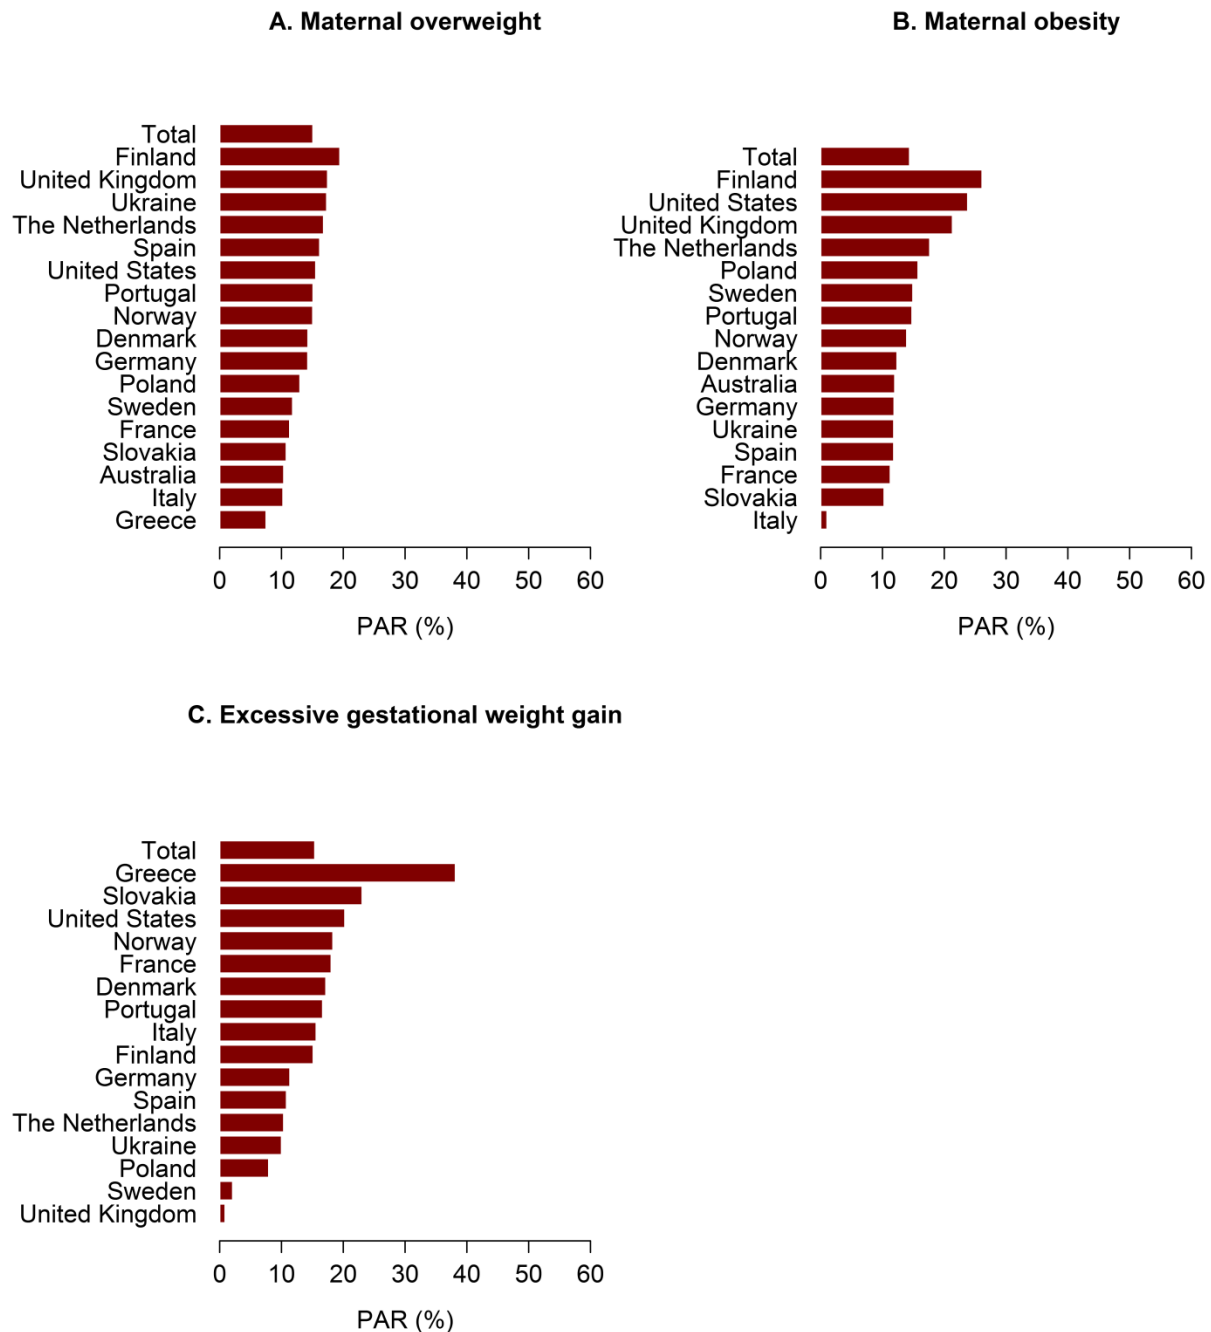

Values are population attributable risk fractions (PAR) indicating the proportion of mid childhood overweight/obesity cases attributable to (A) maternal overweight, (B) maternal obesity and (C) excessive gestational weight gain. The CHOP cohort was excluded from the country-specific analyses, as participants come from multiple countries.
