# Supplementary material for: Maternal body mass index, gestational weight gain, and the risk of overweight and obesity across childhood: An individual participant data meta-analysis
Source: PLOS journal article supplement (doi:10.1371/journal.pmed.1002744), 2019-02-11
Supplement: S10 (10.1371/journal.pmed.1002744.s010) [file journal.pmed.1002744.s010]

**S5 Table. Associations of maternal pre-pregnancy BMI clinical categories with the risk of childhood overweight/obesity, additionally adjusted for gestational-age-adjusted birth weight**

|                                                               | Early childhood<br>2.0-5.0 years                            | Mid childhood<br>5.0-10.0 years                             | Late childhood<br>10-18.0 years                          |
|---------------------------------------------------------------|-------------------------------------------------------------|-------------------------------------------------------------|----------------------------------------------------------|
|                                                               | Overweight/obesity<br>OR (95% CI)                           | Overweight/obesity<br>OR (95% CI)                           | Overweight/obesity<br>OR (95% CI)                        |
| <b>Maternal pre-pregnancy BMI</b>                             |                                                             |                                                             |                                                          |
| <b>Underweight</b><br>( $<18.5$ kg/m <sup>2</sup> )           | 0.60 (0.49, 0.72)<br>n <sub>cases/total</sub> =126/3,162    | 0.46 (0.42, 0.51)<br>n <sub>cases/total</sub> =401/4,485    | 0.45 (0.36, 0.56)<br>n <sub>cases/total</sub> =93/877    |
| <b>Normal weight</b><br>(18.5-24.9 kg/m <sup>2</sup> )        | Reference<br>n <sub>cases/total</sub> =3,092/57,293         | Reference<br>n <sub>cases/total</sub> =13,870/82,438        | Reference<br>n <sub>cases/total</sub> =2,505/13,497      |
| <b>Overweight</b><br>(25.0-29.9 kg/m <sup>2</sup> )           | 1.61 (1.50, 1.72)<br>n <sub>cases/total</sub> =1,476/17,013 | 1.86 (1.80, 1.93)<br>n <sub>cases/total</sub> =6,556/23,359 | 2.25 (2.05, 2.46)<br>n <sub>cases/total</sub> =968/2,799 |
| <b>Obesity</b><br>( $\geq 30.0$ kg/m <sup>2</sup> )           | 2.29 (2.11, 2.49)<br>n <sub>cases/total</sub> =864/7,058    | 2.98 (2.84, 3.12)<br>n <sub>cases/total</sub> =3,612/9,248  | 4.42 (3.86, 5.07)<br>n <sub>cases/total</sub> =528/1,000 |
| <b>Obesity class I</b><br>(30.0-34.9 kg/m <sup>2</sup> )      | 2.23 (2.03, 2.45)<br>n <sub>cases/total</sub> =613/5,142    | 2.77 (2.62, 2.92)<br>n <sub>cases/total</sub> =2,552/6,874  | 4.02 (3.44, 4.71)<br>n <sub>cases/total</sub> =363/726   |
| <b>Obesity class II</b><br>(35.0-39.9 kg/m <sup>2</sup> )     | 2.40 (2.05, 2.82)<br>n <sub>cases/total</sub> =190/1,489    | 3.37 (3.06, 3.72)<br>n <sub>cases/total</sub> =782/1,836    | 5.82 (4.38, 7.74)<br>n <sub>cases/total</sub> =129/215   |
| <b>Obesity class III</b><br>( $\geq 40.0$ kg/m <sup>2</sup> ) | 2.69 (2.04, 3.55)<br>n <sub>cases/total</sub> =61/427       | 4.85 (4.07, 5.77)<br>n <sub>cases/total</sub> =278/538      | 5.35 (3.13, 9.13)<br>n <sub>cases/total</sub> =36/59     |

Values are odds ratios (95% confidence intervals) from multilevel binary logistic regression models that reflect the risk of childhood overweight in early childhood (2.0-5.0 years), mid childhood (5.0-10.0 years) and late childhood (10.0-18.0 years) in children of mothers in the different pre-pregnancy BMI groups, as compared with the reference group (normal weight). The models are adjusted for maternal age, education level, ethnicity, parity, smoking during pregnancy, and gestational-age-adjusted birth weight.
